# Supplementary material
Source: ML conference proceedings conference paper supplement (https://openreview.net/forum?id=WYnvP3DePZ)
Supplement: supplementary_material [file note.pdf › link-representation-gnn/note.pdf]

This folder includes the source code, which is the same as that provided in the anonymized GitHub repository. The appendix material has already been incorporated into the main manuscript.

Best regards,  
The Authors
